# Supplementary material
Source: PubMed Central journal article supplement (PMC2141821)
Supplement: pnas_0700446104_1.pdf [file pnas_0700446104_1.pdf]

**Table 5. Pairwise estimates of  $F_{ST}$  based on microsatellite variation (above diagonal), and  $\Phi_{ST}$  (below diagonal, top number) and  $\delta$  (below diagonal, bottom number) based on control region sequences for 17 populations of *O. castro*.‡**

|      | Portugal | Azores |       |       |       |       | Desertas |       | Selvagem |       | Canaries | Cape Verde |       |       | Galapagos |       | Japan |
|------|----------|--------|-------|-------|-------|-------|----------|-------|----------|-------|----------|------------|-------|-------|-----------|-------|-------|
|      | BerC     | BaiC   | BaiH  | PraC  | PraH  | VilC  | DesC     | DesH  | SelC     | SelH  | CanC     | BraH       | RasC  | RasH  | GalC      | GalH  | JapH  |
| BerC |          | 0.05   | 0.17* | 0.03  | 0.16* | 0.01  | 0.00     | 0.04  | 0.00     | 0.05  | 0.00     | 0.62*      | 0.60* | 0.52* | 0.50*     | 0.52* | 0.45* |
| BaiC | 0.05     |        | 0.11* | 0.00  | 0.11* | 0.01  | 0.03     | 0.16* | 0.04     | 0.15* | 0.06     | 0.56*      | 0.53* | 0.46* | 0.44*     | 0.46* | 0.43* |
| BaiH | 0.57*    | 0.58*  |       | 0.17* | 0.00  | 0.19* | 0.19*    | 0.29* | 0.19*    | 0.27* | 0.14*    | 0.40*      | 0.32* | 0.30* | 0.20*     | 0.22* | 0.21* |
| PraC | 0.08*    | 0.02   | 0.63* |       | 0.16* | 0.00  | 0.01     | 0.10* | 0.02     | 0.13* | 0.04     | 0.59*      | 0.56* | 0.51* | 0.48*     | 0.50* | 0.50* |
| PraH | 0.10*    | 0.04   | 2.48* |       |       |       |          |       |          |       |          |            |       |       |           |       |       |
| PraH | 0.64*    | 0.65*  | 0.00  | 0.69* |       | 0.18* | 0.17*    | 0.26* | 0.16*    | 0.25* | 0.14*    | 0.36*      | 0.29* | 0.27* | 0.20*     | 0.22* | 0.24* |
| VilC | 2.92*    | 2.91*  | 0.01  | 2.88* |       |       |          |       |          |       |          |            |       |       |           |       |       |
| VilC | 0.11*    | 0.11   | 0.62* | 0.06* | 0.67* |       | 0.01     | 0.07* | 0.02     | 0.11* | 0.03     | 0.63*      | 0.59* | 0.55* | 0.51*     | 0.53* | 0.52* |
| DesC | 0.15*    | 0.16*  | 2.76* | 0.06* | 3.18* |       |          |       |          |       |          |            |       |       |           |       |       |
| DesC | 0.04     | 0.00   | 0.62* | 0.04  | 0.68* | 0.10* |          | 0.07† | 0.01     | 0.10* | 0.02     | 0.61*      | 0.58* | 0.51* | 0.50*     | 0.52* | 0.48* |
| DesH | 0.04     | 0.01   | 2.74* | 0.05  | 3.14* | 0.13* |          |       |          |       |          |            |       |       |           |       |       |
| DesH | 0.08     | 0.00   | 0.55* | 0.05  | 0.60* | 0.10* | 0.07*    |       | 0.05     | 0.10* | 0.01     | 0.71*      | 0.70* | 0.62* | 0.60*     | 0.61* | 0.56* |
| SelC | 0.14     | 0.04   | 2.41* | 0.06  | 2.79* | 0.17* | 0.11*    |       |          |       |          |            |       |       |           |       |       |
| SelC | 0.06     | -0.02  | 0.61* | 0.03  | 0.67* | 0.08* | 0.02     | 0.02  |          | 0.08* | 0.00     | 0.61*      | 0.57* | 0.53* | 0.46*     | 0.49* | 0.49* |
| SelH | 0.06     | -0.01  | 2.55* | 0.03  | 2.95* | 0.10* | 0.02     | 0.03  |          |       |          |            |       |       |           |       |       |
| SelH | 0.21*    | 0.22*  | 0.66* | 0.13* | 0.72* | 0.13* | 0.18*    | 0.11* | 0.09*    |       | 0.07     | 0.66*      | 0.64* | 0.58* | 0.57*     | 0.58* | 0.51* |
| CanC | 0.21*    | 0.16*  | 2.87* | 0.10* | 3.30* | 0.15* | 0.15*    | 0.15* | 0.08*    |       |          |            |       |       |           |       |       |
| CanC | 0.07     | 0.26   | 0.52* | 0.14  | 0.60* | 0.03  | 0.21     | 0.03  | 0.16     | 0.27* |          | 0.65*      | 0.63* | 0.52* | 0.48*     | 0.49* | 0.42* |
| BraH | 0.17     | 0.27   | 2.33* | 0.14  | 2.72* | 0.09  | 0.28     | 0.10  | 0.16     | 0.26* |          |            |       |       |           |       |       |
| BraH | 0.77*    | 0.78*  | 0.75* | 0.83* | 0.76* | 0.81* | 0.81*    | 0.76* | 0.81*    | 0.83* | 0.71*    |            | 0.01  | 0.02  | 0.59*     | 0.58* | 0.50* |
| RasC | 7.61*    | 7.61*  | 7.10* | 7.55* | 7.04* | 7.95* | 7.85*    | 7.29* | 7.66*    | 7.78* | 7.01*    |            |       |       |           |       |       |
| RasC | 0.81*    | 0.83*  | 0.76* | 0.87* | 0.78* | 0.84* | 0.85*    | 0.55* | 0.65*    | 0.88* | 0.75     | 0.19       |       | 0.00  | 0.54*     | 0.53* | 0.43* |
| RasH | 3.78*    | 3.66*  | 3.70* | 3.66* | 3.63* | 3.94* | 3.88*    | 3.39* | 3.71*    | 3.92* | 3.23     | 0.83       |       |       |           |       |       |
| RasH | 0.91*    | 0.93*  | 0.86* | 0.93* | 0.87* | 0.91* | 0.93*    | 0.88* | 0.92*    | 0.94* | 0.92*    | 0.24*      | 0.43* |       | 0.49*     | 0.49* | 0.40* |
| GalC | 10.5*    | 10.4*  | 9.97* | 10.4* | 9.83* | 10.9* | 10.7*    | 10.1* | 10.5*    | 10.7* | 9.76*    | 0.61*      | 2.37* |       |           |       |       |
| GalC | 0.86*    | 0.87*  | 0.83* | 0.89* | 0.84* | 0.86* | 0.88*    | 0.83* | 0.84*    | 0.89* | 0.84*    | 0.82*      | 0.84* | 0.91* |           | 0.00  | 0.42* |
| GalH | 8.06*    | 7.93*  | 8.66* | 7.86* | 8.57* | 8.24* | 8.17*    | 7.64* | 7.97*    | 8.23* | 7.42*    | 9.42*      | 6.40* | 11.7* |           |       |       |
| GalH | 0.81*    | 0.82*  | 0.79* | 0.85* | 0.81* | 0.83* | 0.84*    | 0.79* | 0.87*    | 0.86* | 0.78*    | 0.79*      | 0.80* | 0.88* | 0.02†     |       | 0.40* |
| JapH | 7.59*    | 7.44*  | 8.05* | 7.36* | 7.94* | 7.76* | 7.67*    | 7.17* | 7.49*    | 7.75* | 6.96*    | 9.06*      | 6.07* | 10.1* | 0.04†     |       |       |
| JapH | 0.66*    | 0.66*  | 0.65* | 0.72* | 0.67* | 0.71* | 0.70*    | 0.62* | 0.70*    | 0.74* | 0.60*    | 0.72*      | 0.73* | 0.84* | 0.74*     | 0.69* |       |
|      | 3.81*    | 3.66*  | 4.08* | 3.70* | 4.10* | 4.08* | 3.92*    | 3.44* | 3.73*    | 4.10* | 3.49*    | 6.64*      | 3.93* | 8.76* | 4.84*     | 5.32* |       |

\*Significantly greater than 0 after sequential Bonferroni corrections.

†Significantly greater than 0 at  $\alpha = 0.05$  before Bonferroni correction (i.e. significant for a single pairwise comparison).

‡Population abbreviations as in SI Table 3. Comparisons involving sympatric seasonal races are shaded.
